# Supplementary material for: The long non-coding RNA LUCAT1 is a negative feedback regulator of interferon responses in humans
Source: PubMed Central journal article supplement (PMC7733444; doi:10.1038/s41467-020-20165-5), 2020-12-11
Supplement: 41467_2020_20165_MOESM3_ESM.pdf [file 41467_2020_20165_MOESM3_ESM.pdf]

## **Descriptions of Additional Supplementary Files**

### **Supplementary Data 1**

**Description:** iBAQ values of proteins pulled down with LUCAT1 probes in ChIRP-MSiBAQ values of proteins pulled down with LUCAT1 probes in ChIRP-MS
